# Supplementary material for: A Novel Secretory Vesicle from Deer Antlerogenic Mesenchymal Stem Cell-Conditioned Media (DaMSC-CM) Promotes Tissue Regeneration
Source: PubMed Central journal article supplement (PMC5889873; doi:10.1155/2018/3891404), 2018-03-25
Supplement: 3891404.f1.pdf [file 3891404.f1.pdf]

## Supporting information

Table S.1. A list of primers

| Primer |         | oligo sequence               |
|--------|---------|------------------------------|
| Wnt10b | Forward | 5'-TGGAAGAATGCGGCTCTGA-3'    |
|        | Reverse | 5'-CTCTCCAAAGTCCATGTCATGG-3' |
| Wnt3a  | Forward | 5'-TGTTGGGCCACAGTATTCCT-3'   |
|        | Reverse | 5'-ATGAGCGTGTCACTGCAAAG-3'   |
| GAPDH  | Forward | 5'-CCTGACCTGCCGTCTAGAAA-3'   |
|        | Reverse | 5'-TGACAAAGTGGTCGTTGAGG-3'   |
| COL1   | Forward | 5'-GGAGGAGAGTCAGGA-3'        |
|        | Reverse | 5'-GCAACACAGTTACAC-3'        |
| bFGF   | Forward | 5'-AGGAGTGTGTGCTAACCGTT-3'   |
|        | Reverse | 5'-CAGTTCGTTTCAGTGCCACA-3'   |

Table S.2. A list of secreting growth factors

|               |           |            |            |           |              |             |         |         |         |       |             |
|---------------|-----------|------------|------------|-----------|--------------|-------------|---------|---------|---------|-------|-------------|
| POS           | POS       | NEG        | NEG        | AR        | bFGF         | Beta-NGF    | EGF     | EGFR    | FGF-4   | FGF-6 | FGF-7 (KGF) |
| GCSF          | GDNF      | GM-CSF     | HB-EGF     | HGF       | IGFBP-1      | IGFBP-2     | IGFBP-3 | IGFBP-4 | IGFBP-6 | IGF-1 | IGF-1 R     |
| IGF-2         | M-CSF     | M-CSF R    | NT-3       | NT-4      | PDGF R alpha | PDGF R beta | PDGF-AA | PDGF-AB | PDGF-BB | PLGF  | SCF         |
| SCF R (CD117) | TGF alpha | TGF beta 1 | TGF beta 2 | TGF beta3 | VEGF-A       | VEGFR2      | VEGFR3  | VEGF-D  | BLANK   | BLANK | POS         |
